# Supplementary material for: Photophysical insights into fullerene–porphyrazine supramolecular interactions in solution
Source: Royal Society of Chemistry journal article supplement (doi:10.1039/c5ra02003d), 2015-01-01
Supplement: c5ra02003d1.pdf [file c5ra02003d1.pdf]

ESI Supporting Information:

Photophysical Insights on Fullerene-Porphyrazine Supramolecular Interaction In Solution

Anamika Ray,<sup>(a)</sup> Haridas Pal<sup>(b)</sup> and Sumanta Bhattacharya<sup>(a)\*</sup>

<sup>(a)</sup>Department of Chemistry, The University of Burdwan, Golapbag, Burdwan – 713 104, India.

<sup>(b)</sup>Molecular Photochemistry Section, Radiation & Photochemistry Division, Bhabha Atomic Research Centre, Trombay, Mumbai - 400 085, India

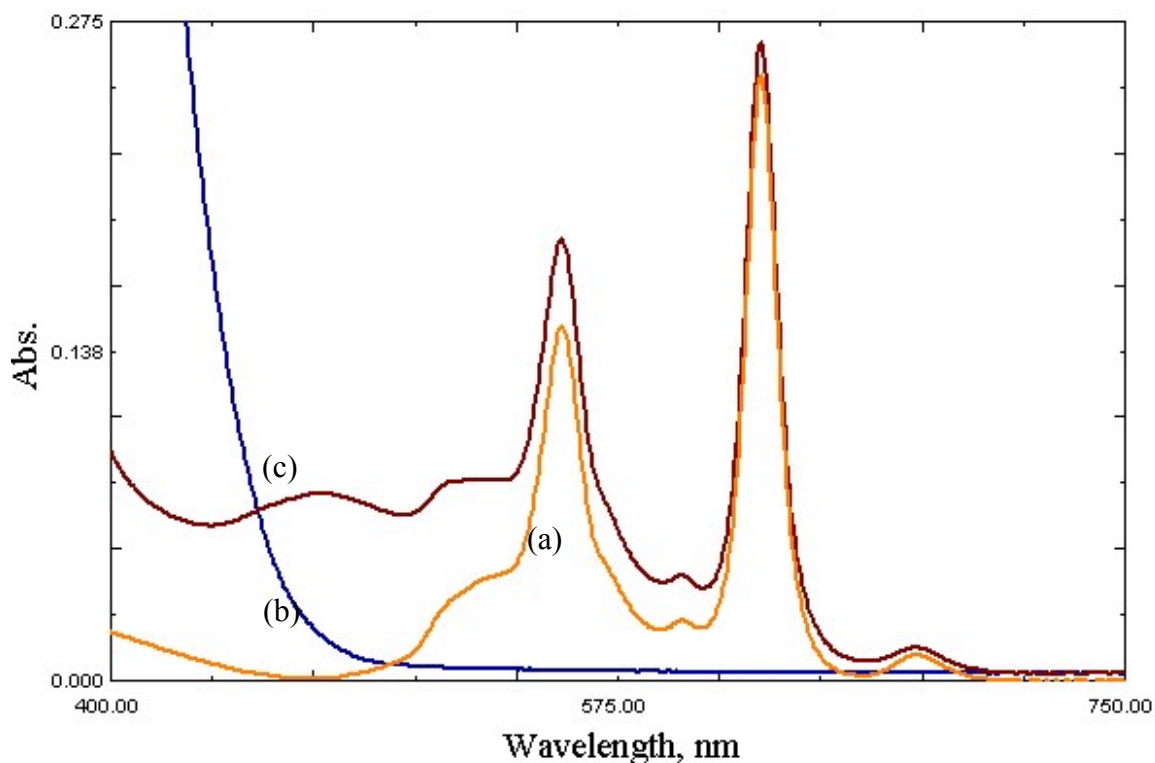

**Fig. S1.** UV-vis spectral variation of (a) **1** ( $3.45 \times 10^{-6}$  M) in DCB recorded against the solvent as reference, (b) *p*-chloranil ( $1.25 \times 10^{-3}$  M) in DCB recorded against the solvent as reference and (c) **1** ( $3.45 \times 10^{-6}$  M) + *p*-chloranil ( $1.25 \times 10^{-3}$  M) in DCB recorded against the pristine acceptor solution in reference; Temp. 298K.

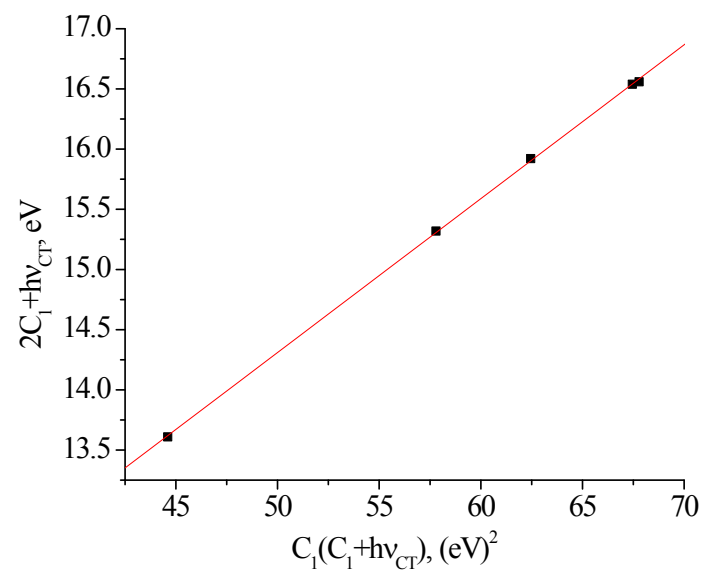

Fig. S2. Determination of  $I_D^v$  of **1**.

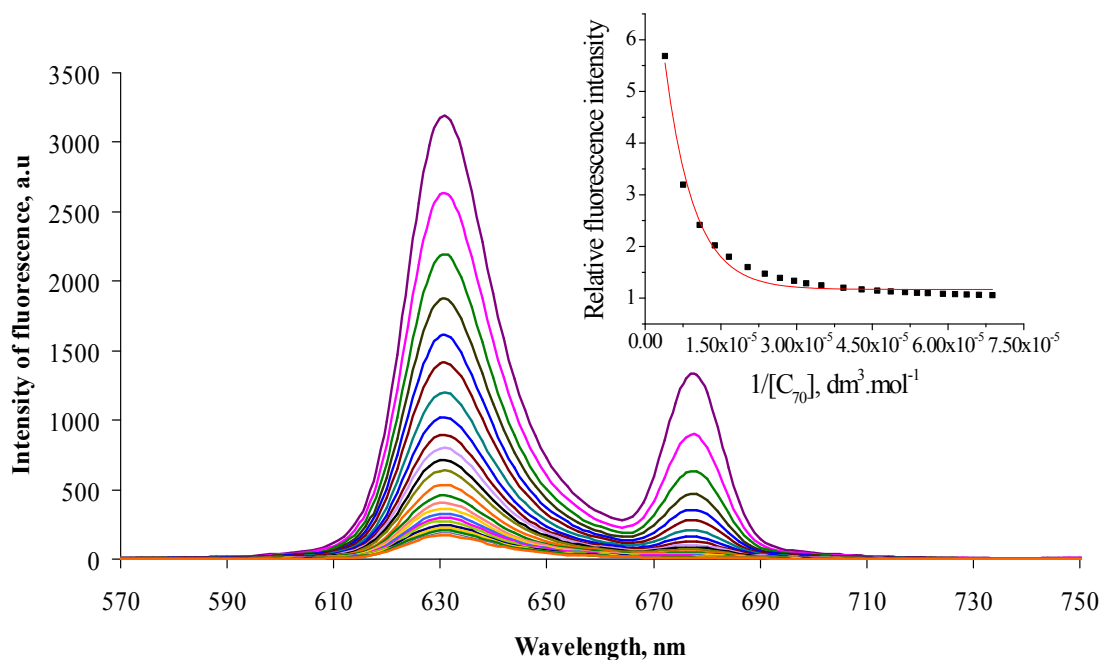

(a)

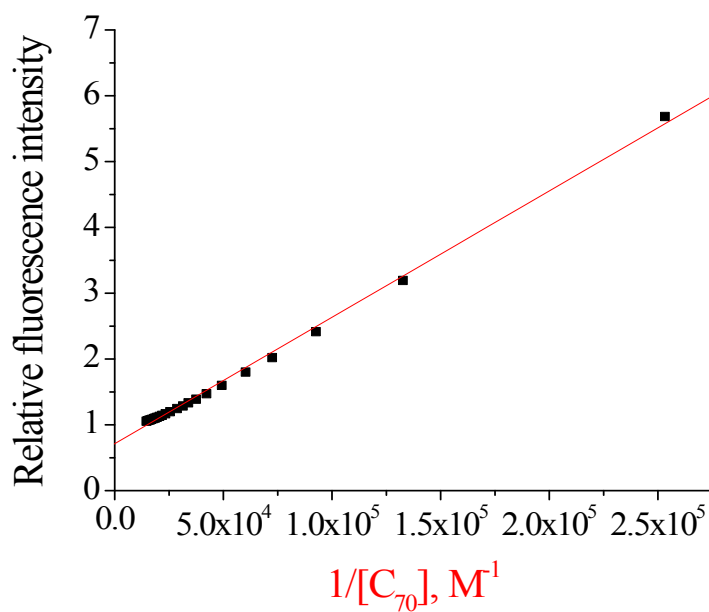

(b)

**Fig. S3.** (a) Steady state fluorescence spectral variation of **1** ( $2.60 \times 10^{-6}$  M) in presence of  $C_{70}$  ( $3.95 \times 10^{-6}$  to  $6.90 \times 10^{-5}$  M) recorded in toluene at 298K; the inset of **Fig. S3** indicates fluorescence induced curve for the same system. (b) Fluorescence BH plot for  $C_{70}$ -**1** system in toluene.  $\lambda_{ex} = 337$  nm;  $\lambda_{em} = 630$  nm.

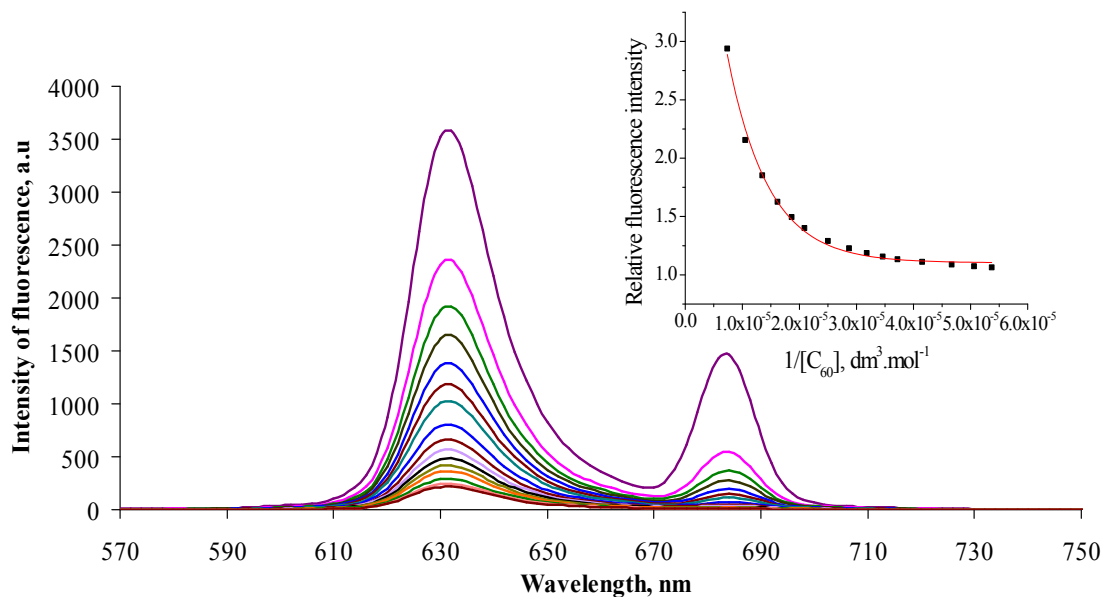

(a)

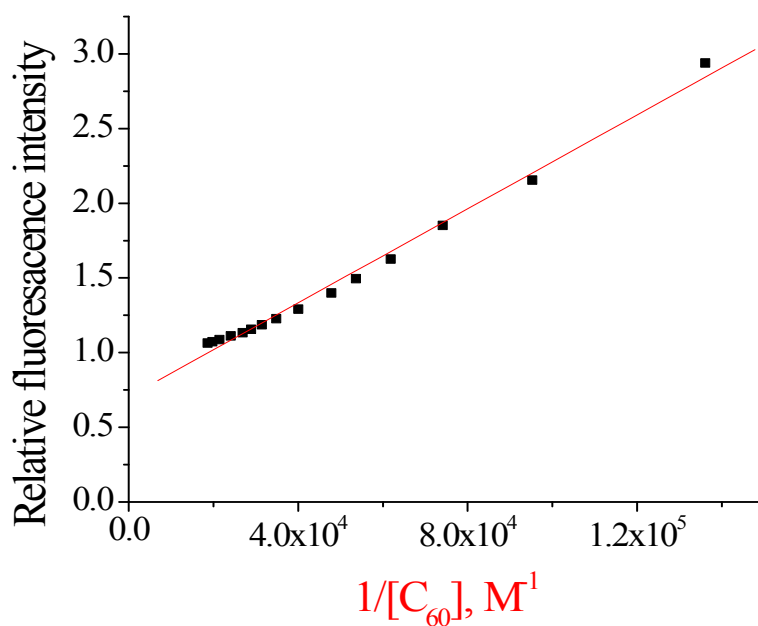

(b)

**Fig. S4.** (a) Steady state fluorescence spectral variation of **1** ( $2.70 \times 10^{-6}$  M) in presence of  $C_{60}$  ( $7.35 \times 10^{-6}$  to  $5.40 \times 10^{-5}$  M) recorded in DCB at 298K; the inset of **Fig. S4** indicates fluorescence induced curve for  $C_{60}/\mathbf{1}$  system. (b) Fluorescence BH plot for  $C_{60}$ -**1** system in DCB.  $\lambda_{\text{ex}} = 340$  nm;  $\lambda_{\text{em}} = 632$  nm.

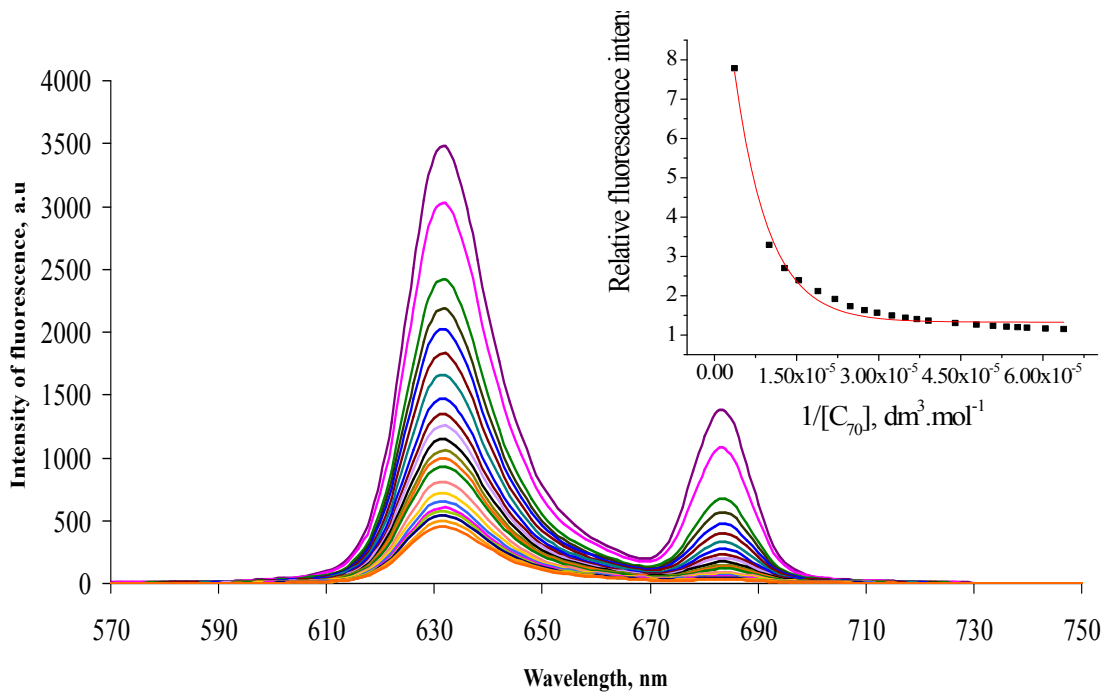

(a)

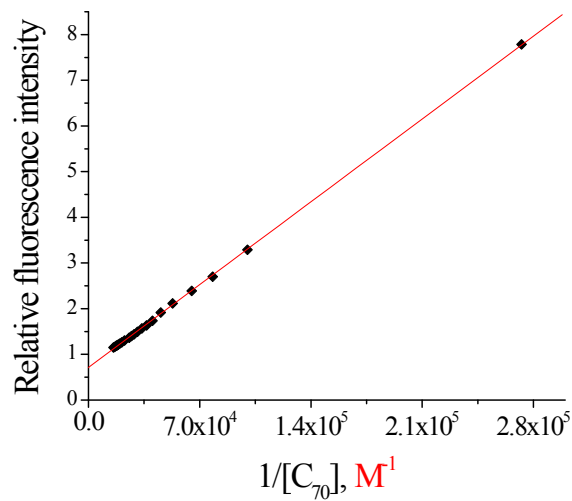

(b)

**Fig. S5.** (a) Steady state fluorescence spectral variation of **1** ( $2.70 \times 10^{-6}$  M) in presence of  $C_{70}$  ( $3.65 \times 10^{-6}$  to  $6.40 \times 10^{-5}$  M) recorded in DCB at 298K; the inset of **Fig. S5** indicates fluorescence induced curve for  $C_{70}$ -**1** system. (b) Fluorescence BH plot for  $C_{70}$ -**1** system in DCB.  $\lambda_{\text{ex}} = 340$  nm;  $\lambda_{\text{em}} = 632$  nm.

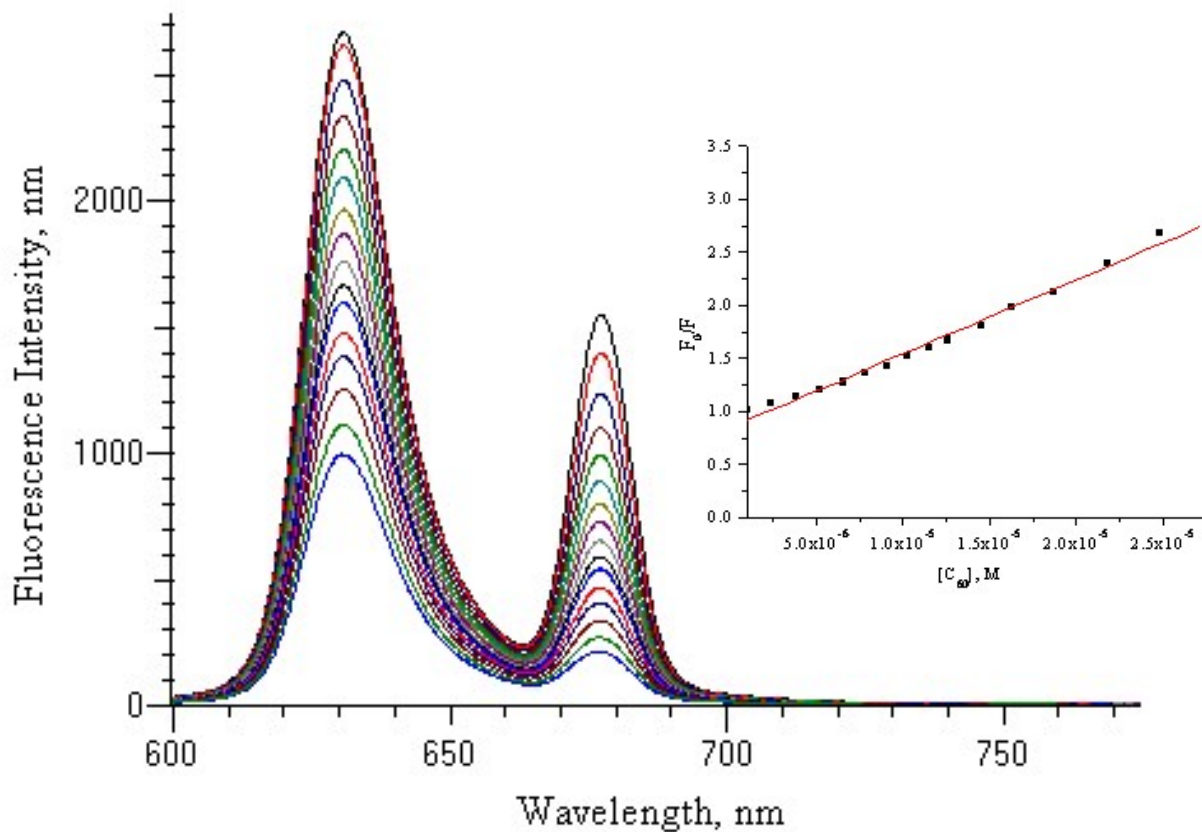

**Fig. S6.** Steady state fluorescence spectral variation of **1** ( $2.6 \times 10^{-6}$  M) in presence of C<sub>60</sub> ( $1.0 \times 10^{-6}$  to  $2.5 \times 10^{-5}$  M) recorded in toluene at 298K; the inset of **Fig. S6** shows SV plot.  $\lambda_{\text{ex}} = 337$  nm;  $\lambda_{\text{em}} = 630$  nm.

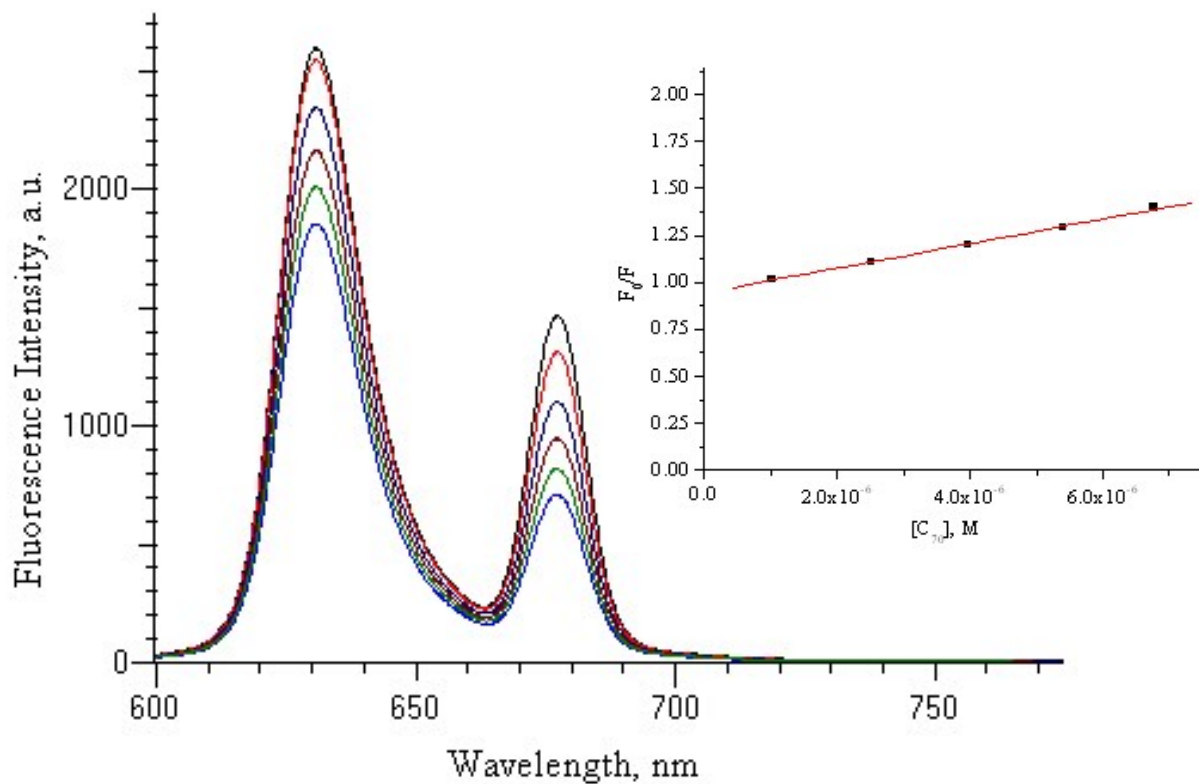

**Fig. S7.** Steady state fluorescence spectral variation of **1** ( $2.6 \times 10^{-6}$  M) in presence of  $C_{70}$  ( $1.0 \times 10^{-6}$  to  $6.80 \times 10^{-6}$  M) recorded in toluene at 298K; the inset of **Fig. S7** shows SV plot.  $\lambda_{\text{ex}} = 337$  nm;  $\lambda_{\text{em}} = 630$  nm.

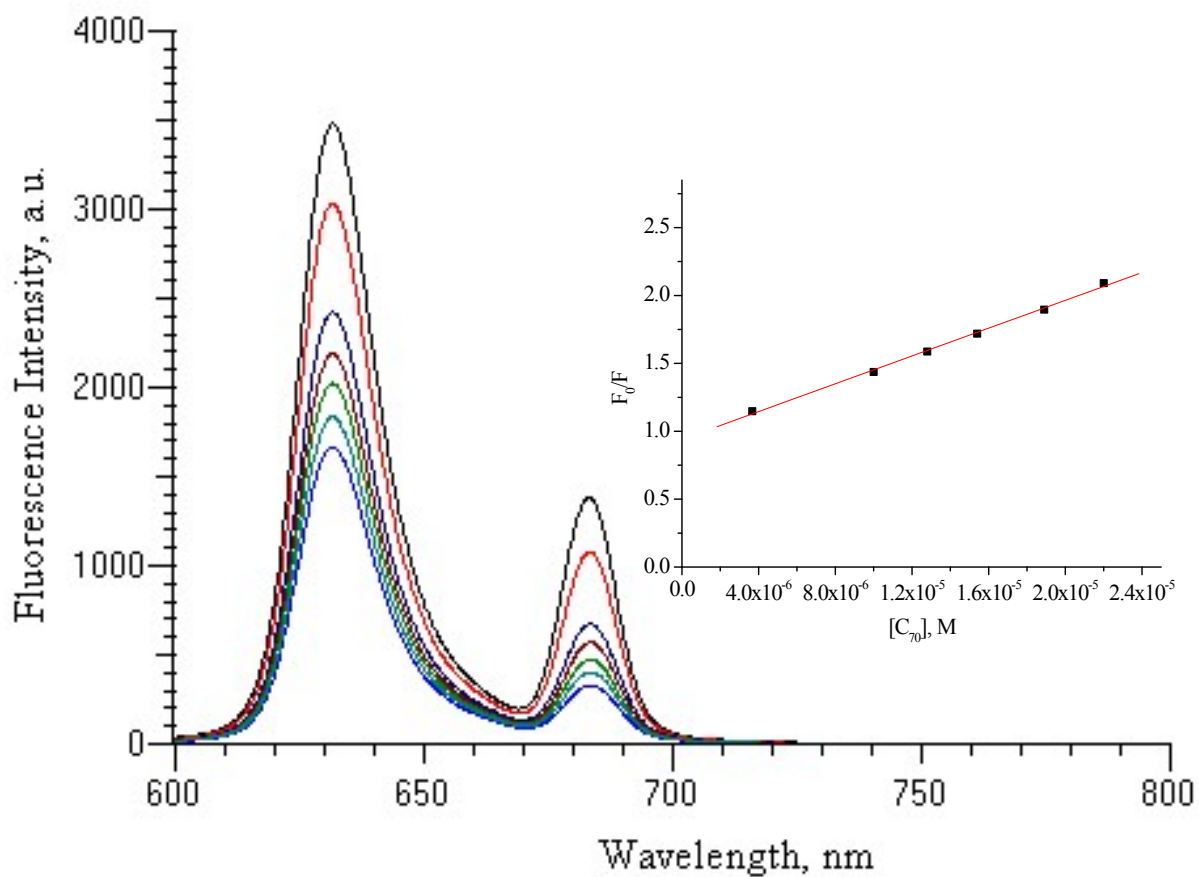

**Fig. S8.** Steady state fluorescence spectral variation of **1** ( $2.6 \times 10^{-6}$  M) in presence of  $C_{70}$  ( $1.0 \times 10^{-6}$  to  $2.2 \times 10^{-5}$  M) recorded in DCB at 298K; the inset of **Fig. S8** shows SV plot.  $\lambda_{ex} = 340$  nm;  $\lambda_{em} = 632$  nm.



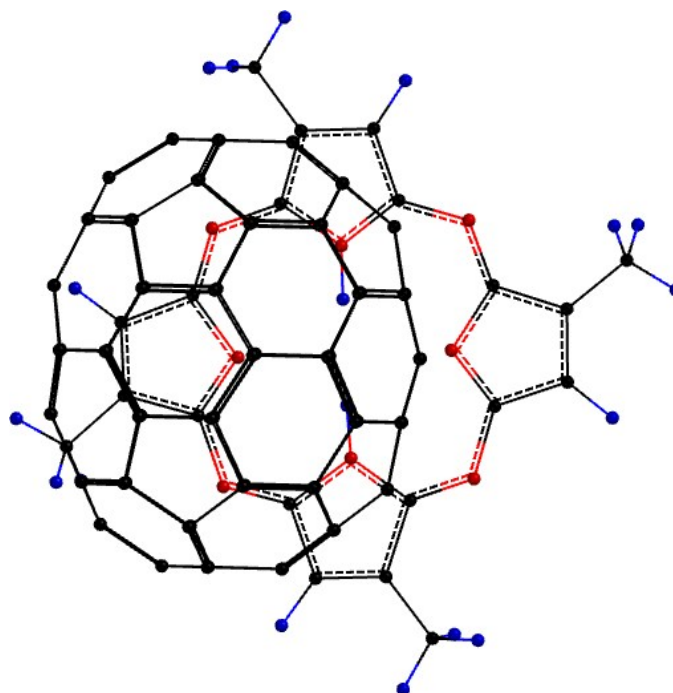

**Fig. S9.** *Ab initio* optimized geometric structure of C<sub>70</sub>-1 complex done in *vacuo* at side-on orientation of C<sub>70</sub>.

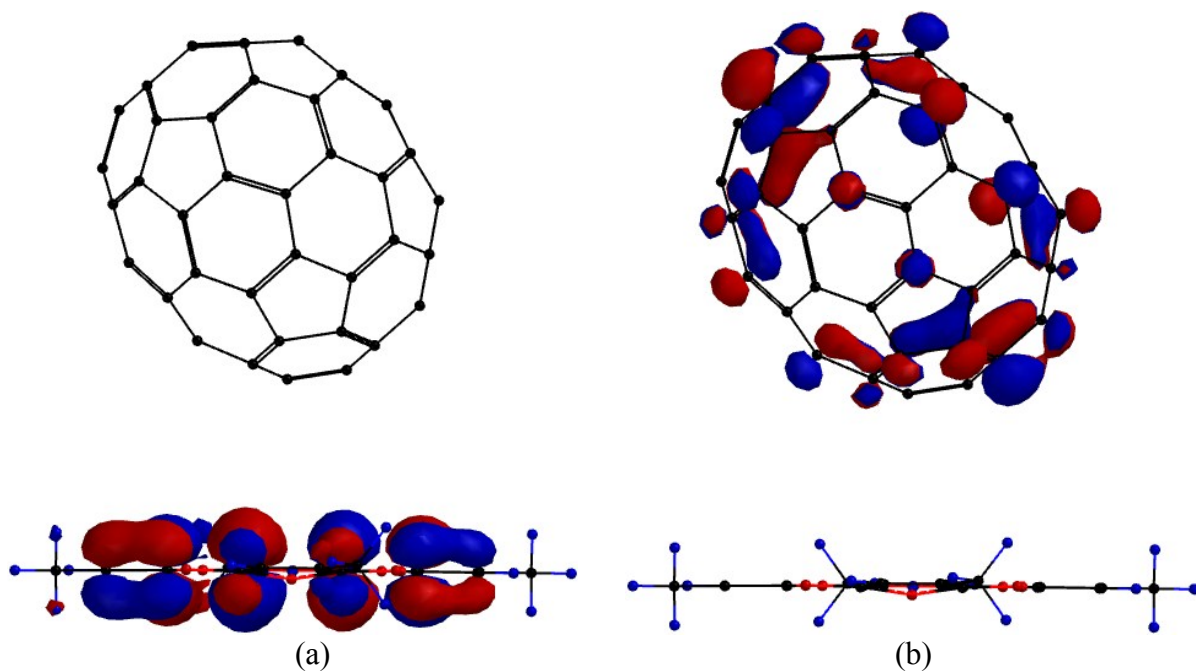

**Fig. S10.** DFT (B3LYP/6-31G\*) calculated frontier (a) HOMO and (b) LUMO for the C<sub>70</sub>-1 complex done in *vacuo* in end-on orientation of C<sub>70</sub>. The calculations are done using SPARTAN '14 software.

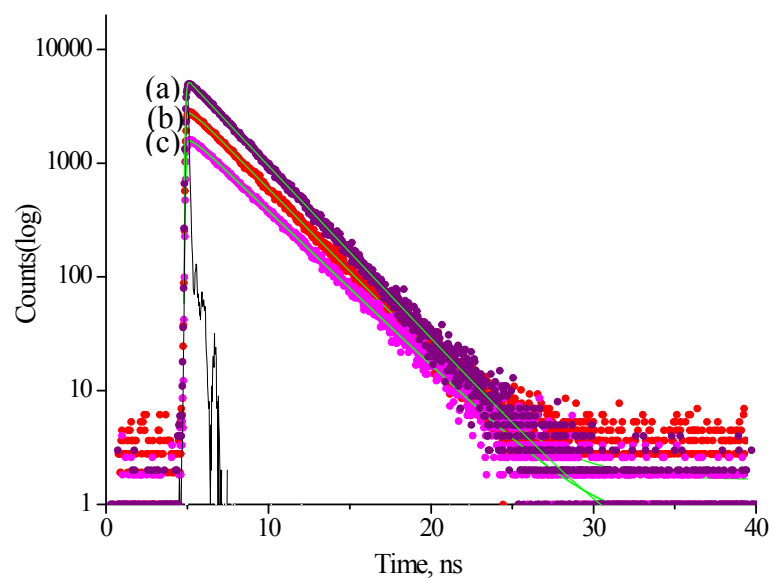

**Fig. S11.** Time-resolved fluorescence decay profile of (a) **1** ( $3.0 \times 10^{-6}$  M) in presence of (b) C<sub>70</sub> ( $5.10 \times 10^{-5}$  M) and (c) C<sub>60</sub> ( $6.7 \times 10^{-5}$  M) recorded in toluene at 298K. Black and green colour lines represent instrument response function and fit to decay, respectively.

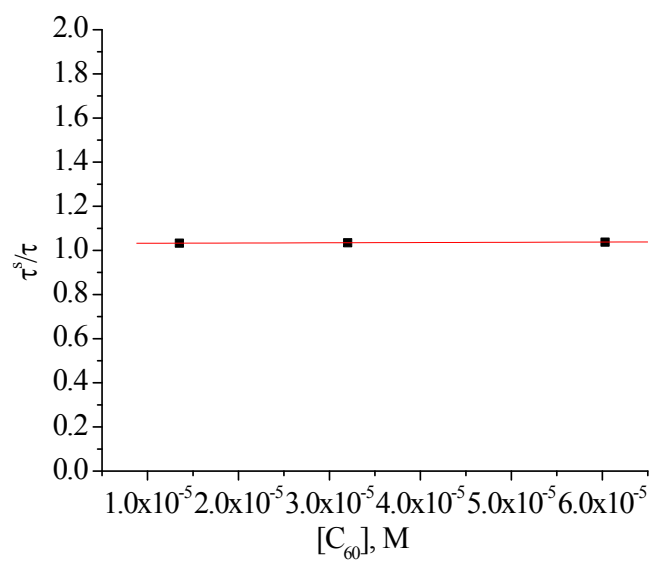

(a)

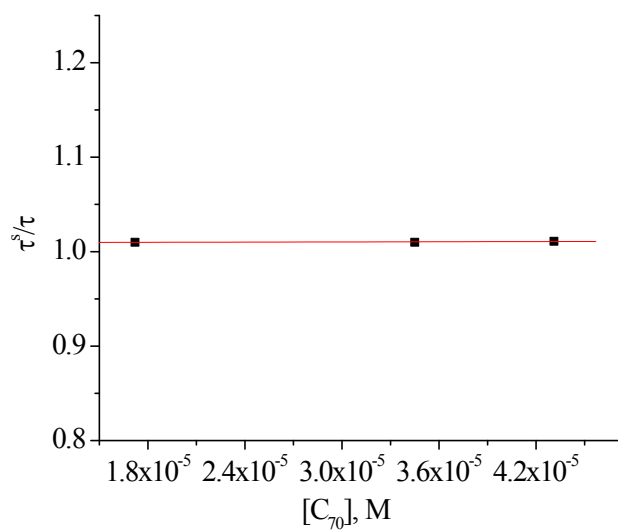

(b)

**Fig. S12.** Plot of  $\tau^s/\tau$  vs. concentration of quencher for (a) C<sub>60</sub>-1 and (b) C<sub>70</sub>-1 system recorded in DCB.

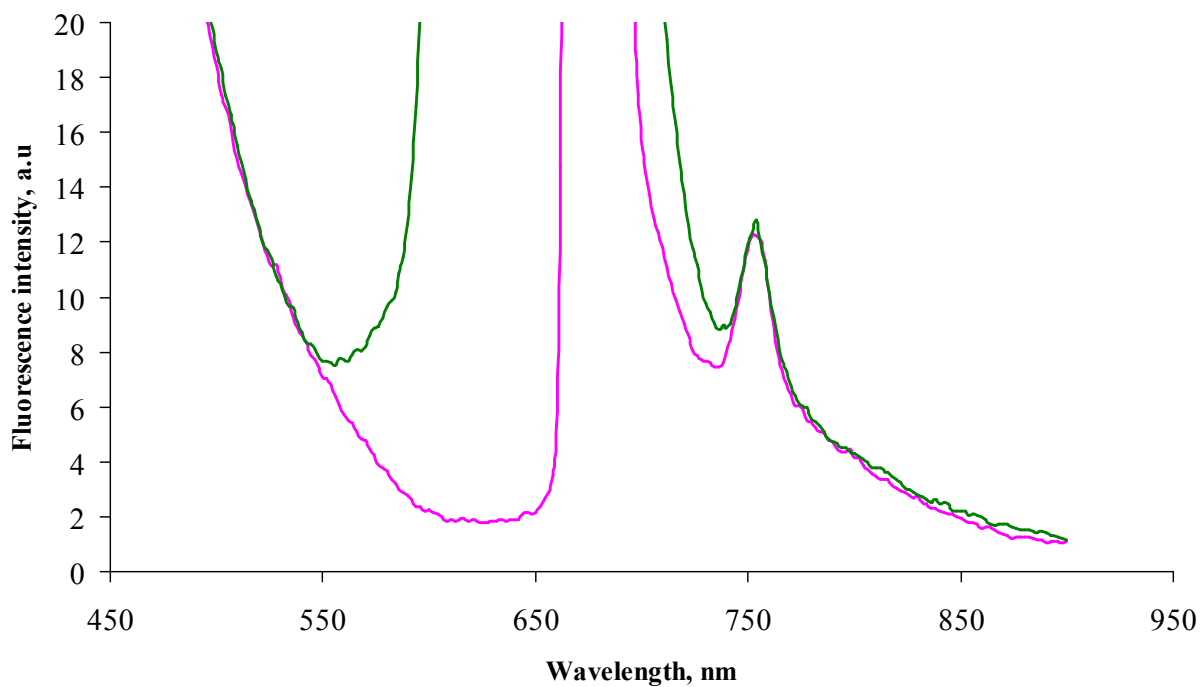

**Fig. S13.** Steady state fluorescence spectral variation of C<sub>60</sub> ( $3.4 \times 10^{-6}$  M, magenta colour line) in presence of **1** ( $2.5 \times 10^{-6}$  M, green colour line) recorded in toluene at 298K;  $\lambda_{\text{ex}} = 337$  nm;  $\lambda_{\text{em}} = 753$  nm.
